# Supplementary material
Source: Elsevier journal article supplement (https://rcastoragev2.blob.core.windows.net/bc61c3efeedb568fccd63699452b8bda/mmc1.pdf)
Supplement: mmc1 [file mmc1.pdf]

## Supplemental Data

### Dystroglycan and Perlecan Provide a Basal Cue

#### that Is Required for Epithelial Polarity

#### during Energetic Stress

Vincent Mirouse, Christina P. Christoforou, Cornelia Fritsch, Daniel St. Johnston, and Robert P. Ray

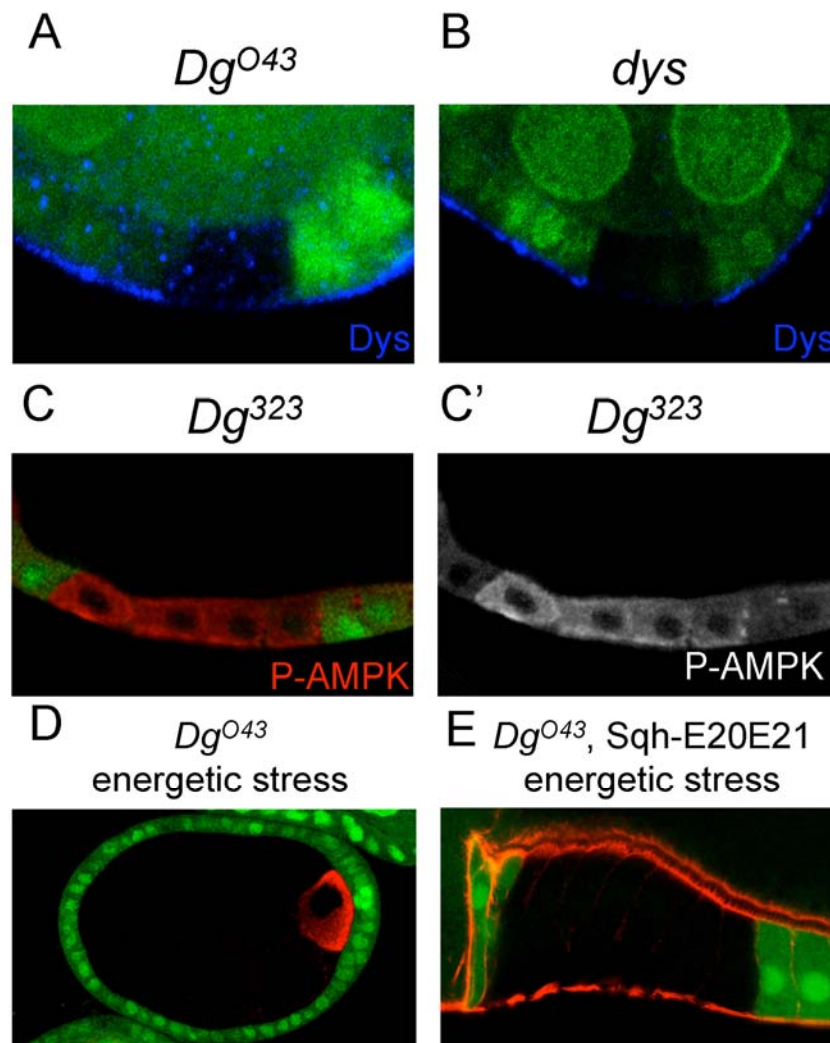

**Figure S1. Mutant Cells Are Marked by the Absence of GFP (green)**

- (A)  $Dg^{O43}$  clone. Dys (blue) is absent from the basal domain
- (B)  $Df(3R)6184$  clone (deleting the entire *dys* locus) Dys is not detected in the mutant cells.
- (C)  $Dg^{323}$  mutant follicle cell clone under normal conditions. PhosphoT184-AMPK is shown in red (white on C').
- (D)  $Dg^{O43}$  germline clone under energetic stress conditions, marked with Orb (red).
- (E)  $Dg^{O43}$  mutant cells under energetic stress conditions and expressing Sqh-E20E21 stained for F-actin (red).

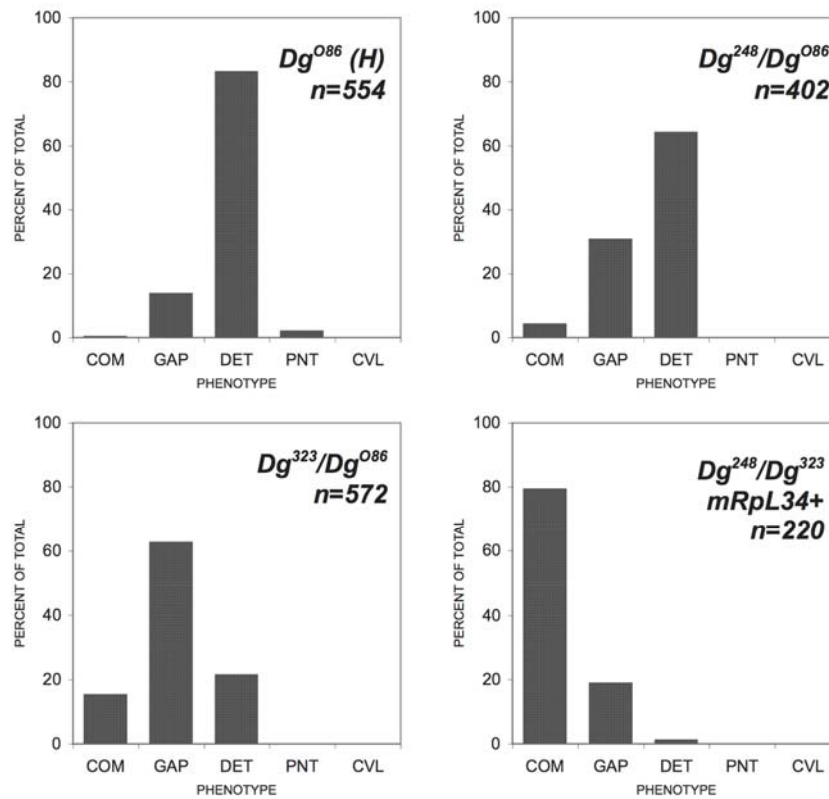

**Figure S2. Expressivity of Crossvein Defects Associated with *Dg* Alleles**

Graphs showing the expressivity of *Dg* allelic combinations on a per wing basis. Genotypes are shown in the upper right hand of the graph, beneath which is indicated the number of wings scored. The phenotypic classes are ‘complete’ (COM), where the crossvein extends from L4 to L4 as in wild type; ‘gapped’ (GAP), where there is a gap between the crossvein and either L4 or L5; ‘detached’ (DET) where the crossvein is gapped from both L4 and L5; ‘point’ (PNT) where only a small spot of crossvein material remains; and ‘crossveinless’ (CVL), where the crossvein is entirely absent (see also Christoforou et al., 2008).

**Table S1. Fertility of *Dg* Mutant Females (Maternal and Maternal+Zygotic Effect)**

| Female genotype <sup>a</sup>                                    | N    | Eggs               |             |                         |                      | % H       | % U+C |
|-----------------------------------------------------------------|------|--------------------|-------------|-------------------------|----------------------|-----------|-------|
|                                                                 |      | <i>hatched (H)</i> | <i>dead</i> | <i>unfertilized (U)</i> | <i>collapsed (C)</i> |           |       |
| <i>pr cn/Dg<sup>O86</sup> pr cn</i>                             | 630  | 584                | 13          | 28                      | 5                    | <b>93</b> | 5     |
| <i>Dg<sup>O38</sup>, pr cn/Dg<sup>O86</sup> pr cn</i>           | 560  | 410                | 8           | 133                     | 9                    | <b>73</b> | 25    |
| <i>Dg<sup>O43</sup>, pr cn/Dg<sup>O86</sup> pr cn</i>           | 632  | 422                | 14          | 184                     | 12                   | <b>67</b> | 31    |
| <i>Dg<sup>O55</sup>, pr cn/Dg<sup>O86</sup> pr cn</i>           | 532  | 353                | 13          | 152                     | 14                   | <b>66</b> | 31    |
| <i>Dg<sup>O38</sup>/Dg<sup>O86</sup> x Dg<sup>O43</sup>/CyO</i> | 900  | 766                | 4           | 119                     | 11                   | <b>85</b> | 14    |
| <i>Dg<sup>O43</sup>/Dg<sup>O86</sup> x Dg<sup>O55</sup>/CyO</i> | 900  | 788                | 9           | 89                      | 14                   | <b>79</b> | 11    |
| <i>Dg<sup>O55</sup>/Dg<sup>O86</sup> x Dg<sup>O38</sup>/CyO</i> | 900  | 735                | 14          | 130                     | 21                   | <b>82</b> | 17    |
| <i>Dg<sup>248</sup>/Dg<sup>O86</sup> pr cn</i>                  | 1593 | 1421               | 37          | 135                     | 0                    | <b>89</b> | 8     |
| <i>Dg<sup>323</sup>/Dg<sup>O86</sup> pr cn</i>                  | 1660 | 1380               | 43          | 237                     | 0                    | <b>83</b> | 14    |

<sup>a</sup>For the first set of crosses, *pr cn* or *Dg<sup>O\*</sup>*, *pr cn/SM6a* males were crossed to *Dg<sup>O86</sup>*, *pr cn/SM6a* virgin females, and virgin females of the genotypes in the table were collected and crossed to Oregon-R males. For the second set, *pr cn* or *Dg<sup>O\*</sup>*, *pr cn/CyO*, *GFP* males were crossed to *Dg<sup>O86</sup>*, *pr cn/CyO*, *GFP* virgin females, and virgin females of the genotypes in the table were collected and crossed to the *Dg<sup>O\*</sup>* mutant not represented in the maternal genotype in trans to the balancer CyO, GFP. For the third set, w\* ; FRT-G13 *Dg248/CyO* males were crossed to *Dg<sup>O86</sup>*, *pr cn/SM6a* virgin females, and virgin females of the genotypes in the table were collected and crossed to Oregon-R males. For all crosses, Eggs were collected at 12 hour intervals and the number of hatched, dead, unfertilized and collapsed eggs were counted 36 hours later.

**Table S2. Viability of  $Dg^{O*}$  Alleles as Transheterozygotes**

| Cross <sup>a</sup>                | N    | Progeny            |              |                         | % Expected <sup>b</sup> |
|-----------------------------------|------|--------------------|--------------|-------------------------|-------------------------|
|                                   |      | $Dg^{O*}/Dg^{O86}$ | $Dg^{O*}/cn$ | $Dg^{O86}/CyO + cn/CyO$ |                         |
| $Dg^{O86}/cn \times Dg^{O38}/CyO$ | 1716 | 263                | 666          | 787                     | 39 (67)                 |
| $Dg^{O86}/cn \times Dg^{O43}/CyO$ | 1820 | 333                | 639          | 848                     | 52 (79)                 |
| $Dg^{O86}/cn \times Dg^{O55}/CyO$ | 1610 | 273                | 627          | 710                     | 44 (77)                 |

<sup>a</sup>For all crosses, isogenic *cn* males were crossed to  $Dg^{O86}, pr\ cn/CyO$  virgin females, and the male  $Dg^{O86}, pr\ cn/cn$  progeny were crossed to  $Dg^{O*}, pr\ cn/CyO$  virgin females. From the latter cross, three classes of progeny are distinguishable, the  $Dg^{O*}, pr\ cn/Dg^{O86}, pr\ cn$  experimental class, the  $Dg^{O*}/cn$  control class and the two *Cy* classes,  $Dg^{O86}, pr\ cn/CyO$  and  $cn/CyO$ , that cannot be distinguished from one another.

<sup>b</sup>For percent expected, the first figure was calculated by dividing the number of  $Dg^{O*}/Dg^{O86}$  progeny by the number of  $Dg^{O*}/cn$  progeny, and the second figure (in parentheses) by dividing the number of  $Dg^{O*}/Dg^{O86}$  progeny by half the total number of *Cy* progeny.

**Table S3. Viability of *Dg* Alleles when Grown without Competition from Heterozygous Larvae (Maternal+Zygotic Effect)**

| Female genotype <sup>a</sup>                                    | N   | Larvae       |              | Adults       |              | % Expected |
|-----------------------------------------------------------------|-----|--------------|--------------|--------------|--------------|------------|
|                                                                 |     | <i>GFP</i> – | <i>GFP</i> + | <i>GFP</i> – | <i>GFP</i> + |            |
| <i>pr cn/pr cn x Dg<sup>O43</sup>/CyO</i>                       | 400 | 200          | 200          | 188          | 177          | <b>106</b> |
| <i>Dg<sup>O38</sup>/Dg<sup>O86</sup> x Dg<sup>O43</sup>/CyO</i> | 499 | 250          | 249          | 201          | 214          | <b>94</b>  |
| <i>Dg<sup>O43</sup>/Dg<sup>O86</sup> x Dg<sup>O55</sup>/CyO</i> | 874 | 424          | 450          | 335          | 386          | <b>92</b>  |
| <i>Dg<sup>O55</sup>/Dg<sup>O86</sup> x Dg<sup>O38</sup>/CyO</i> | 836 | 436          | 400          | 361          | 363          | <b>91</b>  |

<sup>a</sup>*pr cn* or *Dg<sup>O\*</sup>*, *pr cn/CyO*, *GFP* males were crossed to *Dg<sup>O86</sup>*, *pr cn/CyO*, *GFP* virgin females, and virgin females of the genotypes in the table were collected and crossed to the *Dg<sup>O\*</sup>* mutant not represented in the maternal genotype in trans to the balancer *CyO*, *GFP*. *GFP*– and *GFP*– larvae were collected as L1s and reared separately, 50 larvae per vial. Adults were counted as they eclosed until no new progeny were recovered on three successive collections.

<sup>b</sup>For percent of expected, the fraction of *GFP*– adults (= *GFP*–Adults/*GFP*–Larvae) was divided by the fraction of *GFP*– adults (= *GFP*–Adults/*GFP*–Larvae), and the quotient multiplied by 100.

**Table S4. Viability of *Dg* Alleles, *Dg*<sup>248</sup> and *Dg*<sup>323</sup> in Trans to *Dg*<sup>O\*</sup> Alleles**

| Cross <sup>a</sup>                                                             | N   | Progeny                              |                          |                                      | % Expected <sup>b</sup> |
|--------------------------------------------------------------------------------|-----|--------------------------------------|--------------------------|--------------------------------------|-------------------------|
|                                                                                |     | <i>Dg</i> */ <i>Dg</i> <sup>O*</sup> | <i>Dg</i> */ <i>SM6a</i> | <i>Dg</i> <sup>O*</sup> / <i>CyO</i> |                         |
| <i>Dg</i> <sup>248</sup> / <i>CyO</i> x <i>Dg</i> <sup>O38</sup> / <i>SM6a</i> | 594 | 234                                  | 174                      | 186                                  | 130                     |
| <i>Dg</i> <sup>248</sup> / <i>CyO</i> x <i>Dg</i> <sup>O43</sup> / <i>SM6a</i> | 776 | 294                                  | 267                      | 215                                  | 122                     |
| <i>Dg</i> <sup>248</sup> / <i>CyO</i> x <i>Dg</i> <sup>O55</sup> / <i>SM6a</i> | 772 | 250                                  | 289                      | 233                                  | 96                      |
| <i>Dg</i> <sup>248</sup> / <i>CyO</i> x <i>Dg</i> <sup>O86</sup> / <i>SM6a</i> | 608 | 210                                  | 211                      | 187                                  | 106                     |
| <i>Dg</i> <sup>323</sup> / <i>CyO</i> x <i>Dg</i> <sup>O38</sup> / <i>SM6a</i> | 710 | 229                                  | 266                      | 215                                  | 95                      |
| <i>Dg</i> <sup>323</sup> / <i>CyO</i> x <i>Dg</i> <sup>O43</sup> / <i>SM6a</i> | 689 | 264                                  | 232                      | 193                                  | 124                     |
| <i>Dg</i> <sup>323</sup> / <i>CyO</i> x <i>Dg</i> <sup>O55</sup> / <i>SM6a</i> | 762 | 262                                  | 255                      | 245                                  | 105                     |
| <i>Dg</i> <sup>323</sup> / <i>CyO</i> x <i>Dg</i> <sup>O86</sup> / <i>SM6a</i> | 851 | 346                                  | 270                      | 235                                  | 137                     |

<sup>a</sup>For all crosses, *w*\* ; *FRT-G13 Dg*\*/*CyO* males were crossed to *Dg*<sup>O\*</sup>/*SM6a* virgin females. From these crosses, three classes of progeny are distinguishable, *Dg*\*/*Dg*<sup>O\*</sup> transheterozygotes, and the two *Cy* classes, *Dg*\*/*SM6a*, and *Dg*<sup>O\*</sup>/*CyO*.

<sup>b</sup>For percent of expected, the number of *Dg*\*/*Dg*<sup>O\*</sup> progeny was divided by half the number of the two *Cy* classes combined and the quotient multiplied by 100.

**Table S5. Viability of *Dg* Deletion Alleles with the *mRpL34*<sup>+</sup> Transgene**

| Genotype tested <sup>a</sup>                                                                    | N    | Progeny <sup>b</sup>                            |                                     | % Expected <sup>c</sup> |
|-------------------------------------------------------------------------------------------------|------|-------------------------------------------------|-------------------------------------|-------------------------|
|                                                                                                 |      | <i>Dg</i> <sup>*</sup> / <i>Dg</i> <sup>*</sup> | <i>Dg</i> <sup>*</sup> / <i>CyO</i> |                         |
| <i>Dg</i> <sup>248</sup> / <i>Dg</i> <sup>323</sup> ; <i>P</i> [ <i>mRpL34</i> +] <i>J52</i> /+ | 1309 | 442                                             | 867                                 | <b>102</b>              |
| <i>Dg</i> <sup>323</sup> / <i>Dg</i> <sup>248</sup> ; <i>P</i> [ <i>mRpL34</i> +] <i>J52</i> /+ | 610  | 199                                             | 411                                 | <b>97</b>               |
| <i>Dg</i> <sup>248</sup> / <i>Dg</i> <sup>248</sup> ; <i>P</i> [ <i>mRpL34</i> +] <i>J52</i> /+ | 749  | 229                                             | 520                                 | <b>88</b>               |
| <i>Dg</i> <sup>323</sup> / <i>Df</i> -2457 ; <i>P</i> [ <i>mRpL34</i> +] <i>J52</i> /+          | 424  | 99                                              | 325                                 | <b>61</b>               |
| <i>Dg</i> <sup>248</sup> / <i>Df</i> -2457 ; <i>P</i> [ <i>mRpL34</i> +] <i>J52</i> /+          | 507  | 112                                             | 395                                 | <b>57</b>               |

<sup>a</sup>For all crosses, the numerators in the genotype are the maternal chromosomes and the denominators the paternal chromosomes, and all parental stocks were in a white mutant background. *P*[*mRpL34*+]*J41* and *P*[*mRpL34*+]*J52* are two independent insertions of the *mRpL34*+ transgene on the third chromosome.

<sup>b</sup>For the first cross, *y w*<sup>1118</sup> ; *Dg*<sup>248</sup>/*CyO* ; *P*[*mRpL24*+]*J52*/*TM6b*, *Tb* males were crossed with *w*<sup>1118</sup> ; *Dg*<sup>323</sup>/*CyO*, *Act-GFP* females; for the second, *y w*<sup>1118</sup> ; *Dg*<sup>323</sup>/*CyO* ; *P*[*mRpL24*+]*J52*/*TM6b*, *Tb* males were crossed with *w*<sup>1118</sup> ; *Dg*<sup>248</sup>/*CyO*, *Act-GFP* females; for the third, *y w*<sup>1118</sup> ; *Dg*<sup>248</sup>/*CyO* ; *P*[*mRpL24*+]*J52*/*TM6b*, *Tb* males were crossed with *w*<sup>1118</sup> ; *Dg*<sup>248</sup>/*CyO*, *Act-GFP* females; and for the fourth and fifth, *y w*<sup>1118</sup> ; *Dg*<sup>\*</sup>/*CyO* ; *P*[*mRpL24*+]*J52*/*TM6b*, *Tb* females were crossed with *w*<sup>1118</sup> ; *Df*(2*R*)*ED2457*/*CyO*, *Act-GFP* males. The numbers in the table reflect only the *Tb*+ progeny from the cross, the *Tb* progeny were not counted.

<sup>c</sup>For percent of expected, the number of *Dg*<sup>\*</sup>/*Dg*<sup>\*</sup> progeny was divided by half the number of the *Dg*<sup>\*</sup>/*Cy* class and the quotient multiplied by 100.
